# Supplementary material for: Grain configuration effect on the phase transition, piezoelectric strain and temperature stability of KNN-based ceramics
Source: Royal Society of Chemistry journal article supplement (doi:10.1039/c8tc05253k), 2018-12-24
Supplement: c8tc05253k1.pdf [file c8tc05253k1.pdf]

Grain configuration effect on phase transition, piezoelectric strain and  
temperature stability of KNN-based ceramics

Zhenyong Cen, Yan Yu, Peiyao Zhao, Lingling Chen, Chaoqiong Zhu, Longtu Li,

Xiaohui Wang\*

State Key Laboratory of New Ceramics and Fine Processing, School of Materials  
Science and Engineering, Tsinghua University, Beijing 100084, China

\* Corresponding author.

Email address: [wxh@tsinghua.edu.cn](mailto:wxh@tsinghua.edu.cn)

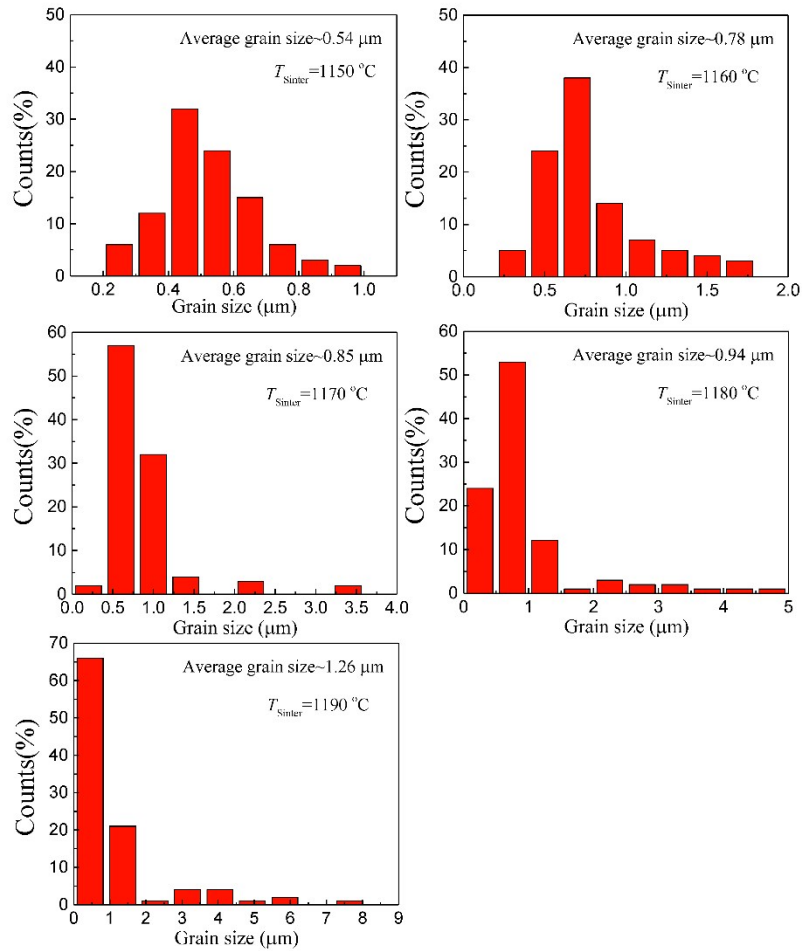

Fig. S1 Grain size distribution of 0.985(0.96KNNTa-0.04BNKZ)-0.015CZ ceramics sintered at different temperatures

The boundaries of the polygons with more than six sides are concave, and in the polygons with fewer than six sides the boundaries are convex. As grain boundaries migrate towards their centers of curvature, the grains with fewer than six sides tend to shrink, while the ones with more than six sides tend to grow.<sup>1</sup> Because the temperature field of the furnace is not the same, the calcined powder is difficult to be completely uniform. Thus, the side number of powder particle should be different. When  $T_{\text{Sinter}}$

increases from 1150 °C to 1190 °C, powder particles with more than six sides grow at a higher rate and powder particles with fewer than six sides shrink at a higher rate. Thus, we consider that the smaller grains appear in samples sintered at 1170-1190 °C, which attributes to the shrinkage of powder particles with fewer than six sides. In other words, when  $T_{\text{Sinter}}$  increases from 1170 °C to 1190 °C, the small grains become smaller and coarse grains become larger. A similar report has been found.<sup>2</sup>

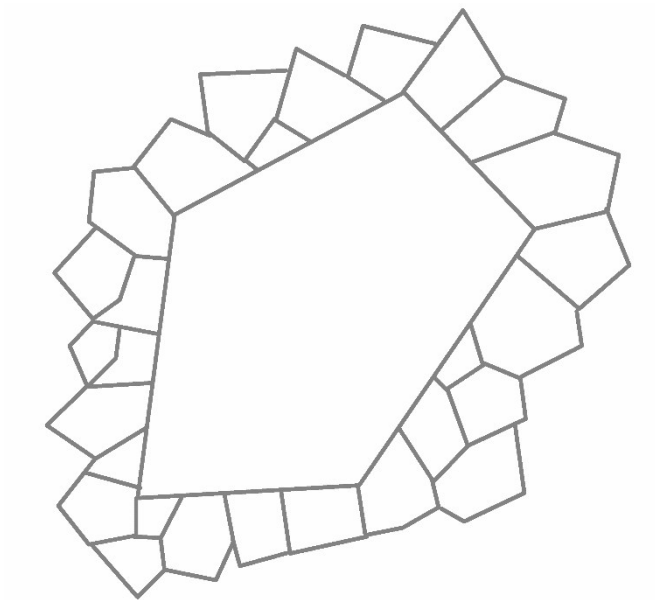

Fig. S2 Diagrammatic sketch of abnormal region

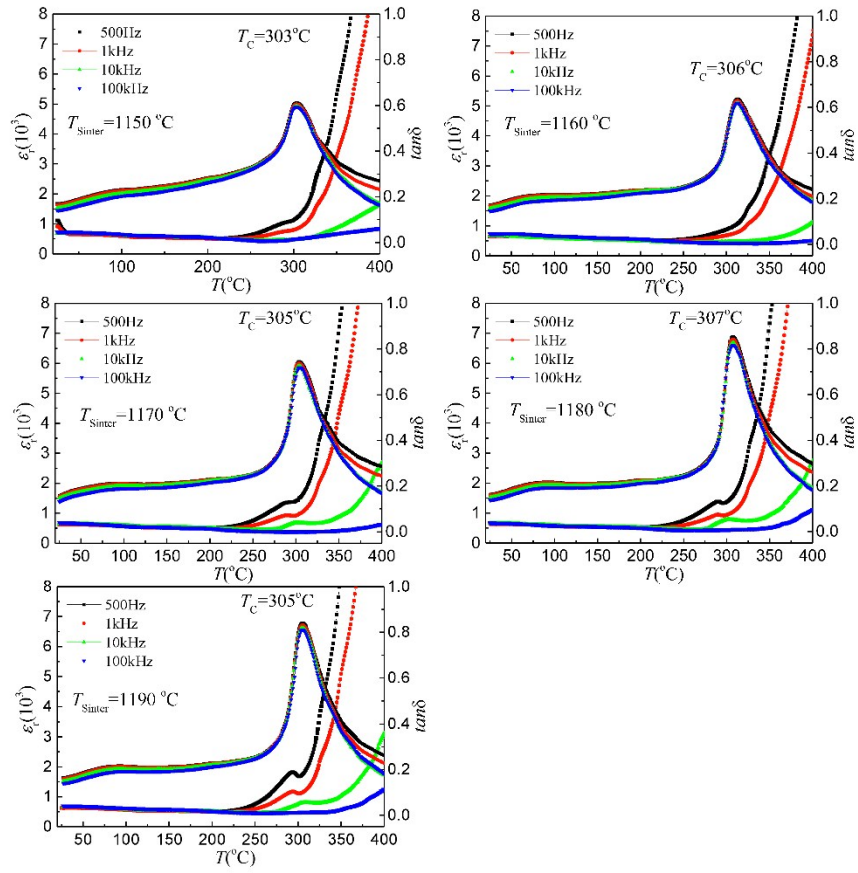

Fig. S3 Dielectric constant ( $\epsilon_r$ ) and dielectric loss ( $\tan \delta$ ) as a function of temperature for 0.985(0.96KNNT-0.04BNKZ)-0.015CZ ceramics sintered at different temperatures

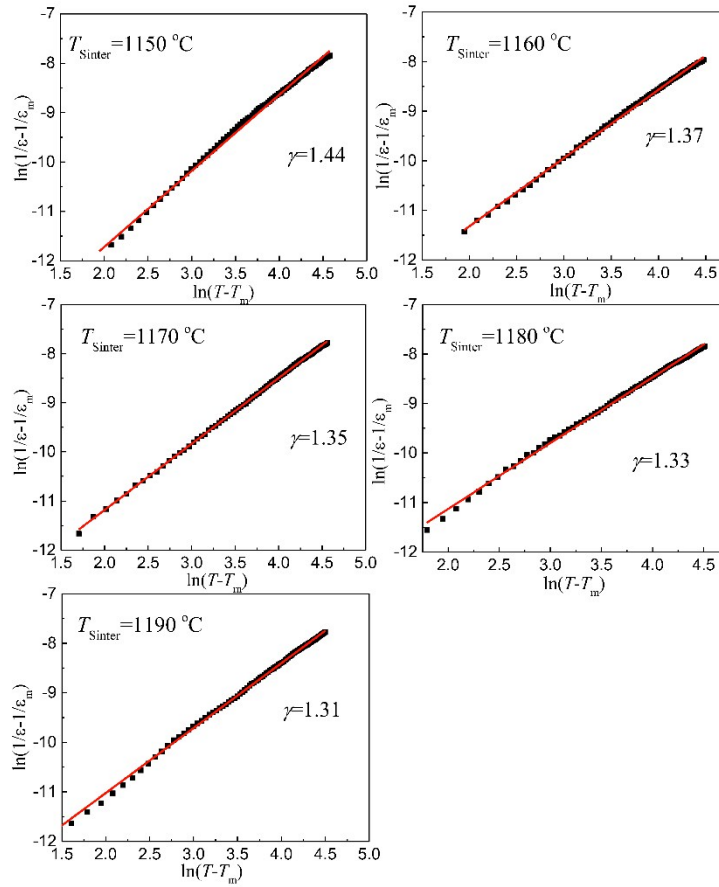

Fig. S4  $\ln(1/\epsilon - 1/\epsilon_m)$  as a function of  $\ln(T - T_m)$  at 100 kHz for 0.985(0.96KNNT-0.04BNKZ)-0.015CZ ceramics sintered at different temperatures (Symbols: experimental data; Solid line: fitting to modified Curie-Weiss law)

1. Malič B, Koruza J, Hreščak J, Bernard J, Wang K, Fisher J, et al. Sintering of lead-free piezoelectric sodium potassium niobate ceramics. *Materials*. 2015;8(12):8117-8146
2. Amaral L, Fernandes M, Reaney I M, Harmer M P, Senos A M R, and Vilarinho P M. Grain growth anomaly and dielectric response in Ti-rich Strontium Titanate ceramics. *J Phys Chem C*. 2013;117(47):24787-24795
